# Supplementary material for: Ammonia excretion inCaenorhabditis elegans: mechanism and evidence of ammonia transport of the Rhesus protein CeRhr-1
Source: Oxford University Press journal article supplement (doi:10.1242/jeb.111856), 2015-03-01
Supplement: jeb111856_supp.pdf [file jeb111856_supp.pdf]

```

A. aegypti Rh50 GP2 -----MSSLGSSVCGYVLLLLVQIVLIIVFGFFFTNYSKELLPIINTI-----NGTTV
M. sexta Rh-like -----MVLKYSAMKYSPLVLLVQILMLVLFIVRYGDEKE-----
T. rubripes Rhcg2* -----MGNFFGRQR-----NAYVVRVSLPAVCFVWQIAMIILFGVFIYRNEESDAHWVE-----HKKTNMI
H. sapiens RhCG* -----MAN-----NTNLRWRLPLTCLLLQVIMVILFGVFRYDFEADAHWS-----ERTKHLN
C. intestinalis Rh-like MCLRCPIPPMYVRYLKLHLFAHSNTRGKATALLLVQAIIQLLVFLGFLVDYDVAAGPRMNS-----LTHHTLL
C. gigas Rh-like -----MATVKSMLRIIPLAIIVQIVFLIIFGIKIEYHETAKP-----VDTV
M. magister Rh-like -----MKLSHVHGFALG-VQVAFVILFCFAVRYHPDAHARVHPLVNGSELENDHY
C. elegans Rhr-2 -----MWSVLRHRQFAIIAGLMQTVFIVLFAKYKIDP--LD-----DSR
C. elegans Rhr-1* -----MRSPLHQNCLTLLGLPQVFLVIFALYSYDASALFS-----ETK

A. aegypti Rh50 GP2 EEMEEETPLAKYPHFQDIHVMIFFIGFGLMTFLKRYGFSATGLNLLVAALAIQWAIVMRGCYVMEGG--IPLS
M. sexta Rh-like -----AHVRGFEFTHVMIFFVGFGLMTFLKRYCSALGFNLLAALVQWALLCQSFFTMKDNT---IYIT
T. rubripes Rhcg2* -----TSDIENDFYRYPSFQDVHVMIFVGFGLMTFLKRYSGVGFNLLIAAFGIQWALLMQGFHFLDSTKGIYIG
H. sapiens RhCG* S--DMENEFYRYPSFQDVHVMIFVGFGLMTFLQRYGFSAVGFNLLAAFGIQWALLMQGFHFLQDRY--IVVG
A-----HYPIYQDVHVMMLIGFGLMTFLKRRHGFSGVGFNLLTCVYIEWSTLVNWFVGMIGSNEGRILLID
C. intestinalis Rh-like K--PSIVGGLYPSFQDVHVMIFIGFGLMTFLKRYGFSVAVSINLLASFCAQWAIIVR--AAISGN--WTVG
C. gigas Rh-like KSDDPWIHSKSYPMFQDVHVMIFIGFGLMMFLKRYGLSVAENFMIAALCLQWAILNNGFFHKKGT--IVVD
M. magister Rh-like RVYSGT---DYFLQDVHLMIFVGFGLMAFLKRYGFSVAVSNLLSAFVIQFALLRGMFVAFVAFETGLSFG
C. elegans Rhr-2 NVEEAARMTNLYLFQDTHVMIFIGFGLMTFLKRYGFSAVSINMLAVFTIQWGIIVRGMASAHHGFK--FTIS

A. aegypti Rh50 GP2 LDNLLGADIAAAVLLISMGALLGRTPMQLLVMTIFEIAI PAANEFLQ---VDLMRIADVGGISITVHAFGAYFG
M. sexta Rh-like KKSLLLEADIMSATVLIIFGALLGVATGQLQLLFAIVETVIACLNMLWLV---TDVFKAADVGGSIATHTFGAYFG
T. rubripes Rhcg2* VENLINADFCVAGSLIAYGALLGKVPVQLLVLTFLGVTLFAVEYI---LHLLHCRDAGGSVRAIHAFGAYFG
H. sapiens RhCG* VENLINADFCVAVSVCVAVGALGKVPQLLIMTFQVTLFAVNEFI---LNLKLVKVDAGGSMTIHTFGAYFG
C. intestinalis Rh-like IKSLLEADFAVAVLSIFGAILGVASPVQLVIMATIEVVYCNVSIYVGIHPLTYIQVTVGGSMFIHAFGAYFG
C. gigas Rh-like VMEMLTADFAAATLISFGAVLGTGQLLIMACIEIVLQVNEHIG---VHILHTADVGGSMFIHAFGAYFG
M. magister Rh-like LNAMLGADFAAAVLSIFGAVLGTTPQLIIVLALMEIPLFAVNEVIG---RSYFGAIDMGDSMFVHAFGAYFG
C. elegans Rhr-2 IPEMISAESCAAVLITMGVLLGRPLVQVQLLAFETGIVNVLVEHYV---FNYLHVDSGRSLSVHTFGAYFG
C. elegans Rhr-1* LEQLLTADFAAAVLLISMGALLGRLSPSQVIMAFFETPVVALIVEHIC---VFNLIQINDVGGSIIVHAFGAYFG
      Ω Δ ε

A. aegypti Rh50 GP2 LAVSFVLRPNKENCKT---G-----PMECSSYSSDITAMIGTVFLNIWPSPNSALVDG-AEQERAIINTYLS
M. sexta Rh-like LCVSMALFRFREDTTPMNNGNPAPVVDLNGASYTSVDTAMIGSIFLNIYWPSPNSCLTNSDAEYQRAVINITYLS
T. rubripes Rhcg2* LGISHWLYRPNLHQSK-----RLHGSVYHSDVAMIGTFLMFMWSPNSALVDGAGGSQVRAHAINITYLG
H. sapiens RhCG* LTVTRILYRNLQSK-----ERQNSVYQSLDFAMIGTFLMFMWSPNSAISYRGDSQHRAAINITYCS
C. intestinalis Rh-like LAVARVLYKKSQTLK-----N-EGSEYHSDIFAMIGTFLWLYWSPENAGPES-GTERHRAVINITYLS
C. gigas Rh-like LAVARVLYSEDIERAS-----GKEGAVYHSDLFSMIGTVFLWLYWSPENGGAVI-GQXRAFINITYLS
M. magister Rh-like LAVSMLHRRDAS--T-----EKEGSSYQSLDFAMIGTVFLWLYWSPENAGAAP-GDDHQHGINITYIS
C. elegans Rhr-2 LAACVGHKKNMEMD-----EHGGIHSDFLSMIGTLLWVFFSPNSAIIQEPEDARHAINMITYLS
C. elegans Rhr-1* LACAKGFGKKEQRGHT-----NEGSTYHTDIFAMIGALFLWIYWSPNAAVIAATDARQRAVANTFLS
      Ω Δ

A. aegypti Rh50 GP2 LAGATVTTYIMSMVMV--HEKKFDMVHVQNSTLAGGVAVGSICNLLIHPFGAILVGVIAIGVSVLGYRFLTPAMLS
M. sexta Rh-like LAAATVTFVMSAVNKHGPRFDMVHIQNSTLAGGVAVGSVNCMHIGAGGAMAIGIGSLLSIVGYRFLTP-RIT
T. rubripes Rhcg2* LASCVLTVVALSSMHD-KRGRLDMVHIQNSTLAGGVAAGTAAEFMISPYGALIVGFCCGIISTFGYLVTPFLEK
H. sapiens RhCG* LAACVLTVAISSALH-KRGKLDVMIQNSTLAGGVAAGTAAEMMLMYPYGALIGFVCGIISTLGFVYLVTPFLEK
C. intestinalis Rh-like LSACTVVTVALSAVD-KKNKLDVMIQNSTLAGGVAIGASADLIVQPFGLLVGSTATVSTLGFYLVTPFVQR
C. gigas Rh-like LLACTVTFIVSSLVLD-KRGKFDVMIQNSTLAGGVAAGTSAHMPIQPWGAMLLGTAGIISVLGYKLVTPLMAS
M. magister Rh-like LAACCLTVFALSTLLD-KHKKFDVMIQNSTLAGGVAAGTAAADLIMHPWGAALIGLAAALVSCCYMFLTPLMAS
C. elegans Rhr-2 MASGTVTFMISSCVD-TLGRFNMHIQNSTLAGGVAIGSSANAVLHPYHAVIVGVIAALLSVIGHAWISPLRLR
C. elegans Rhr-1* LCACTMTTFLVSAVD-KHKRFDMVHIANSTLAGGVAIGTANVVLEPHYHAMIIGVIAGVSVYIKYITPFLSE
      $
      G

A. aegypti Rh50 GP2 KLRISDTCGVNHLHGMPELLSAVFSGIYASVATSEAYGNSLTSIFFAMKPNNTLTEDMHMVIIGYGRSAAM--
M. sexta Rh-like KIGILDTCGVNHLHGMFVSGLLSVLFAGLASAQDYGTLSNVFEAVGPD-----GRSAGS--
T. rubripes Rhcg2* YLKLQDTCGVNHLHGMFVSGLLSVLFAGLASAQDYGTLSNVFEAVGPD-----EGLINTFNEGKYADRSVGT--
H. sapiens RhCG* RLHIQDTCGVNHLHGMFVSGLLSVLFAGLASAQDYGTLSNVFEAVGPD-----EGLVHDFNFGOGNGDWTART--
C. intestinalis Rh-like NIKLHDTCGVNHLHGMFVSGLLSVLFAGLASAQDYGTLSNVFEAVGPD-----DSYHFLFKDASRTSSQ--
C. gigas Rh-like KLRHDTCGVNHLHGMFVSGLLSVLFAGLASAQDYGTLSNVFEAVGPD-----DEGHKG--
M. magister Rh-like RLRHDTCGVNHLHGMFVSGLLSVLFAGLASAQDYGTLSNVFEAVGPD-----QALNQLMAIGLVFLASTVSGYLTGLLLKLRKIQVRRDDEYADGDFYFETPGDYD-----FLSKYKHA
C. elegans Rhr-2 -----QALNQLMAIGLVFLASTVSGYLTGLLLKLRKIQVRRDDEYADGDFYFETPGDYD-----FLSKYKHA
C. elegans Rhr-1* -----QALNQLMAIGLVFLASTVSGYLTGLLLKLRKIQVRRDDEYADGDFYFETPGDYD-----FLSKYKHA
      $ ε G

Aedes aegypti Rh50-GP2 ----QGAYQLLAILLTVVIAIMGGLCTGLVLSPTMRQLEQDEHHKDDVCWETPVELET-----
M. sexta Rh-like ----QALYQFIALAVTIGLSLVGFTVGLLSKMPVFGSLKDAERYDQINWELP-----
T. rubripes Rhcg2* ----QGQYQAAGTCVAVAGLVGVAIVGFLIKPFIWGDPAADNCFDEAYWEVPEDEET--IP--PVLVYNNHMI
H. sapiens RhCG* ----QKGFQIYGLLVTLAMALMGSIIVGLILRLFPWQPSDENCFEDAVYWEMPEGDSTVYIPEDPTFKFPGSPV
C. intestinalis Rh-like ----NGGQIAALVCVLCIALLSGTLTGLLKLFPWNDSAELEFEDEVFWDVSGS-----
C. gigas Rh-like E---QGGYQMAALCLTLAIAIVGGVITGFLKIPFLDNPTGDLDFDKDQWVNADEGF-----PNSGSL
M. magister Rh-like SGTSAQYQLLAILLTVVIAIAGGIVTGIIVLRKFLALKTEELYED-EKWWIMEAEE-----DEGHKG
C. elegans Rhr-2 ----QAYQALGLLTLVTVAVIGGLTGCILKIRKVMQVDDPDPFHGEMNYAQSDVN-----FLSKYKHA
C. elegans Rhr-1* ----QALNQLMAIGLVFLASTVSGYLTGLLLKLRKIQVRRDDEYADGDFYFETPGDYD-----FLSKYKHA

```

Supplemental figure S1: Clustal W amino acid alignment (Thompson et al., 1994) of CeRhr-1 with other Rh-glycoproteins including vertebrate Rh-proteins of verified ammonia transport capability (indicated by \*). Conserved ammonia-conducting residues are highlighted with a grey background. Symbol Δ indicates ammonia-conducting residues in the external vestibule; symbol Ω indicates ammonia-conducting residues in the pore entrance; symbol ε indicates ammonia-conducting residues in the pore center; symbol \$ indicates ammonia-conducting residues in the internal vestibule (Khademi et al., 2004; Wu et al., 2010; Zidi-Yahiaoui et al., 2009). G indicates the predicted N-glycosylation-site in CeRhr-1 (green underlaid) and CeRhr-2 (red underlaid). Yellow underlaid are the predicted 12 transmembrane domains of CeRhr-1 (Ji et al., 2006). GenBank accession numbers are given in brackets behind the species name. *Aedes aegypti* Rh50-GP2 (AY926464), *Manduca sexta* Rh-like protein (ABI20766), *Homo sapiens* RhCG (AAH30965), *Takifugu rubripes* Rhcg2 (AB218982), *Ciona intestinalis* Rh type B glycoprotein (NP\_001027959), *Crassostrea gigas* Rh type B-A (EKC21768), *Metacarcinus magister* Rh-like protein (AEA41159), *Caenorhabditis elegans* Rhr-1 (NM\_072035), *Caenorhabditis elegans* Rhr-2 (NP\_505961). Asterisks indicate transporters with verified ammonia transport capabilities (Marini et al., 2000; Nawata et al., 2010b).

**Table S1. Primers employed in real-time PCR targeting actin, rhesus (Rh)-like ammonia transporter (CeRhr-1, CeRhr-2), vesicular H<sup>+</sup>-ATPase (VHA; subunit A), Na<sup>+</sup>/K<sup>+</sup> ATPase (NKA;  $\alpha$ -subunit) from the nematode *Caenorhabditis elegans***

| Primer                                     | Nucleotide sequence (5' → 3')             | Annealing Temp. (°C) | Product size (bp) | GenBank Acc. # |
|--------------------------------------------|-------------------------------------------|----------------------|-------------------|----------------|
| <i>Actin</i>                               |                                           |                      |                   |                |
| CeActin-F                                  | ATCGTCCTCGACTCTGGAGAT                     | 60                   |                   |                |
| CeActin-R                                  | TCACGTCCAGCCAAGTCAAG                      | 60                   | 100               | NM_073417      |
| <i>Rhr-1</i>                               |                                           |                      |                   |                |
| CeRhr-1 F                                  | TTCTTGTCTGAGAACTCGGA                      | 60                   |                   |                |
| CeRhr-1 R                                  | GATTGCCATAAGCTGGTTCAA                     | 60                   | 210               | NM_072035      |
| CeRhr-1 SpeI F                             | GTATAACTAGTCAAAAAATGAG<br>TCGCCTCT        | 60                   |                   |                |
| CeRhr-1 SmaI R                             | GTATACCCGGGTTATTAGACCTCT<br>TTTTGGCTGAGTG | 60                   | 1422              | NM_072035      |
| <i>Rhr-2</i>                               |                                           |                      |                   |                |
| CeRhr-2 F                                  | ACAGTGGTAGATCTCTTTCC                      | 60                   |                   |                |
| CeRhr-2 R                                  | GCTGCATCTTCTGGTTCTTG                      | 60                   | 205               | NM_073560      |
| <i>Na<sup>+</sup>/K<sup>+</sup>-ATPase</i> |                                           |                      |                   |                |
| CeNKA F                                    | GACCTCGGAACTGACATGGT                      | 60                   |                   |                |
| CeNKA R                                    | CCCATAAGCAAGGGAGATCA                      | 60                   | 135               | U18546         |
| <i>H<sup>+</sup>-ATPase</i>                |                                           |                      |                   |                |
| CeVHA F                                    | CTTGAAGGCTCGTGAAGACC                      | 60                   |                   |                |
| CeVHA R                                    | ACGACTTCCTTTTCGAGCAA                      | 60                   | 150               | NM_068639.5    |
